# Supplementary material
Source: ML conference proceedings conference paper supplement (https://openreview.net/forum?id=WDAKFpWftI)
Supplement: supplementary_material [file e2e_performance_fp8_1024_32.pdf › NestedFP-main/NestedFP-main/utils/draw/e2e_performance_fp8_1024_32.pdf]

—○— Torch FP16    —■— Torch FP8    —×— NestedFP16    —●— NestedFP8

Throughput (toks/s)

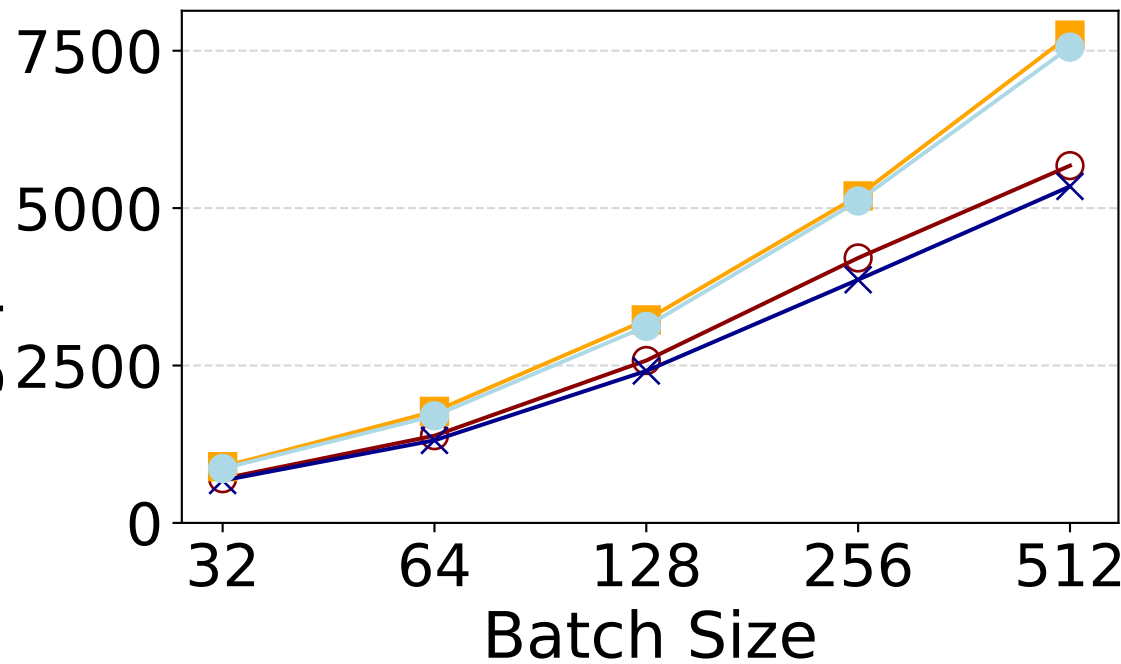

LLaMA3.1(8B)

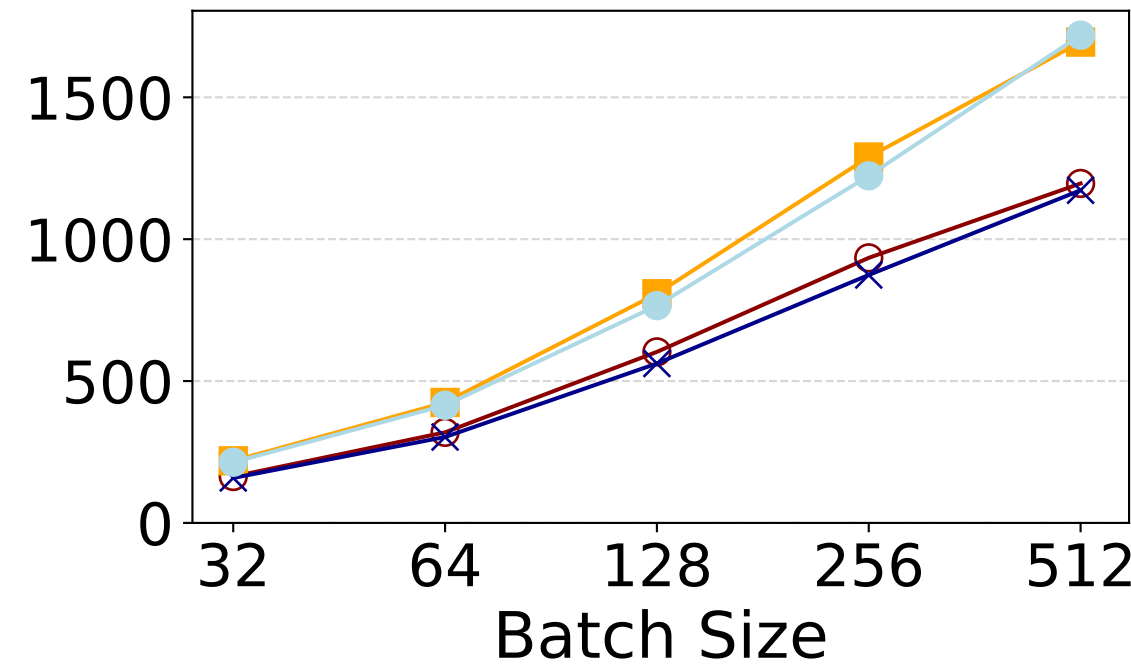

Mistral-Nemo(12B)

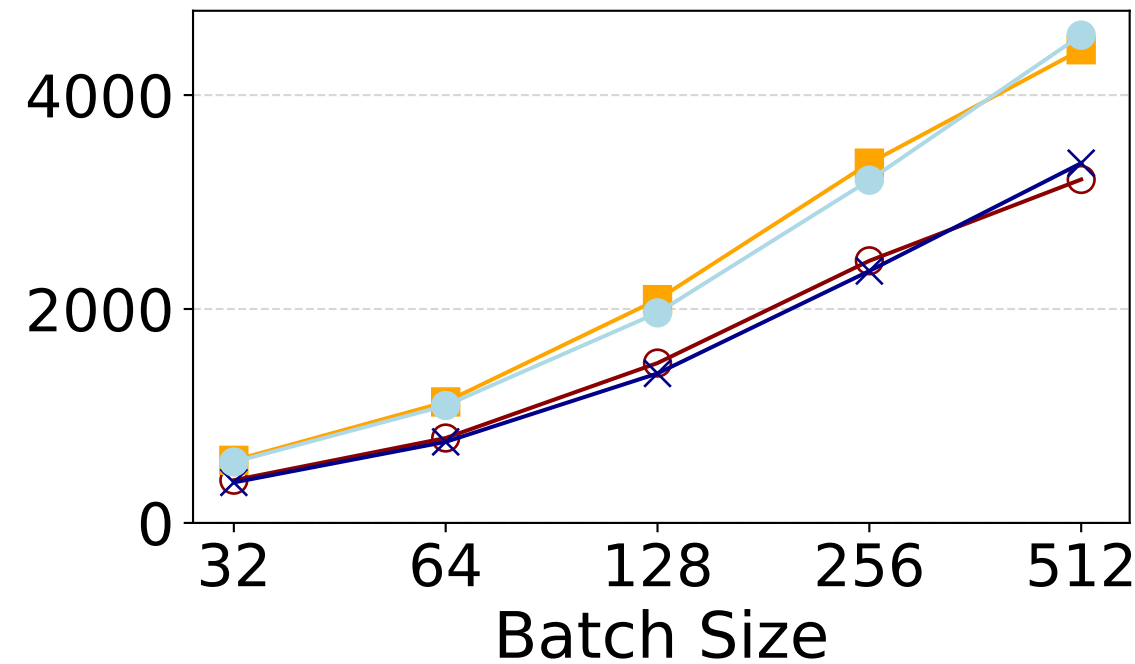

Phi-4(14B)

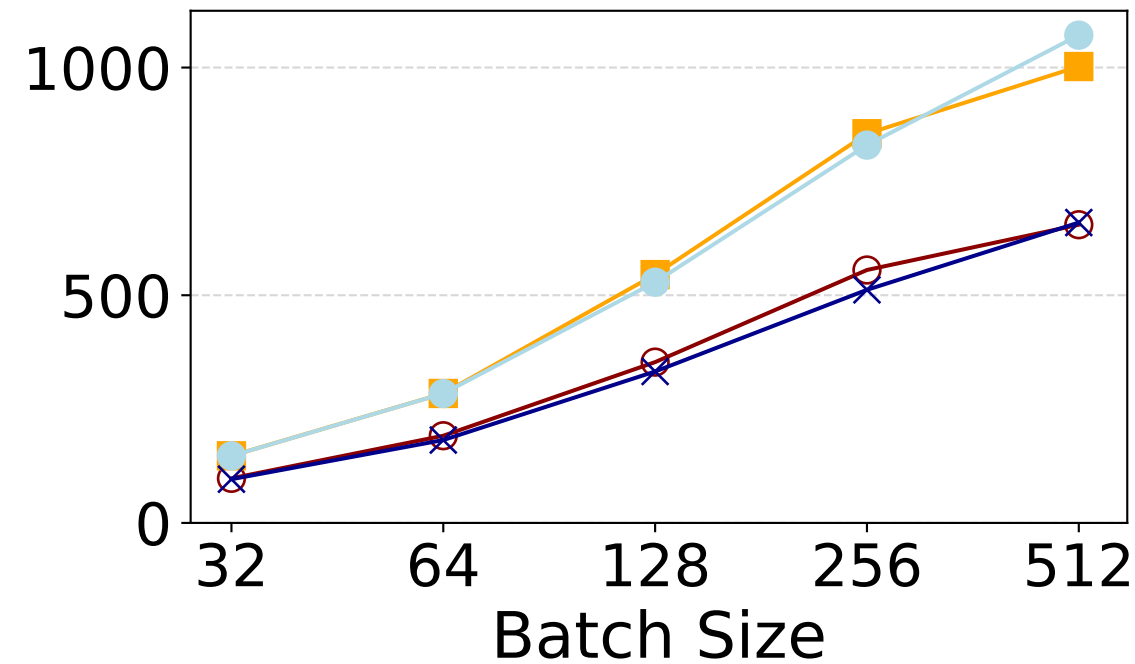

Mistral-Small(24B)
