# Supplementary material
Source: ML conference proceedings conference paper supplement (https://openreview.net/forum?id=WDAKFpWftI)

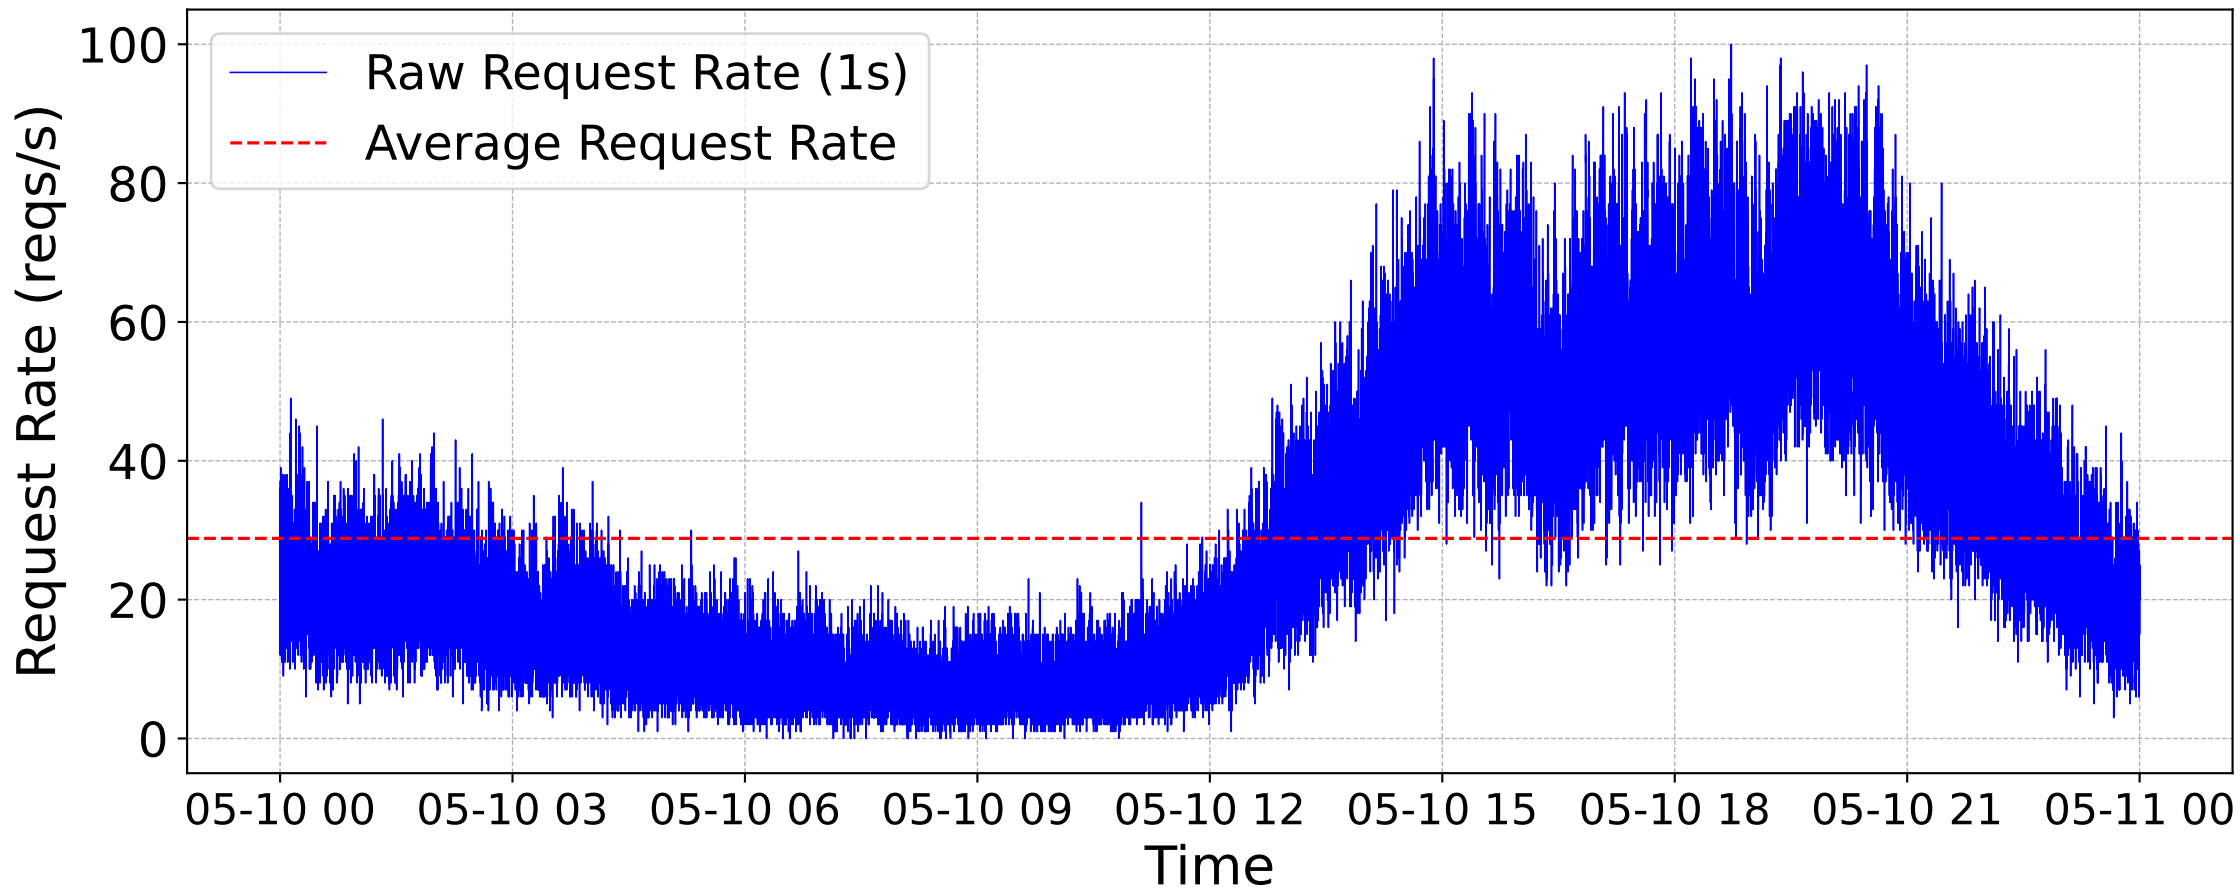

Supplement: supplementary_material [file request_rate.pdf › NestedFP-main/NestedFP-main/end_to_end_test/online/trace/request_rate.pdf]

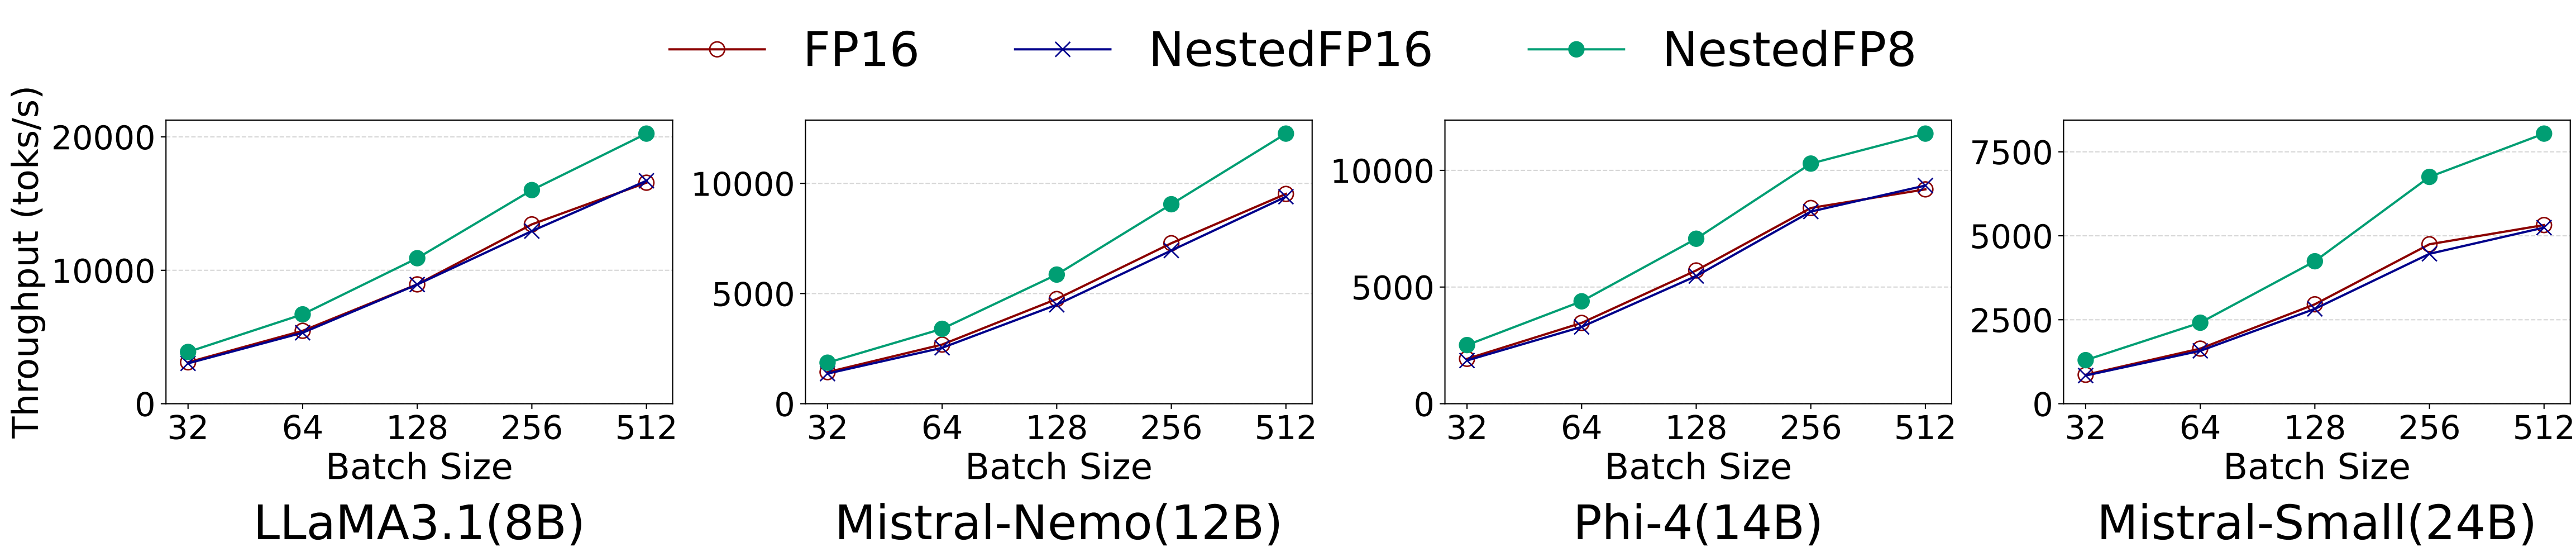

Supplement: supplementary_material [file e2e_performance.pdf › NestedFP-main/NestedFP-main/utils/draw/e2e_performance.pdf]

—○— Torch FP16    —■— Torch FP8    —×— NestedFP16    —●— NestedFP8

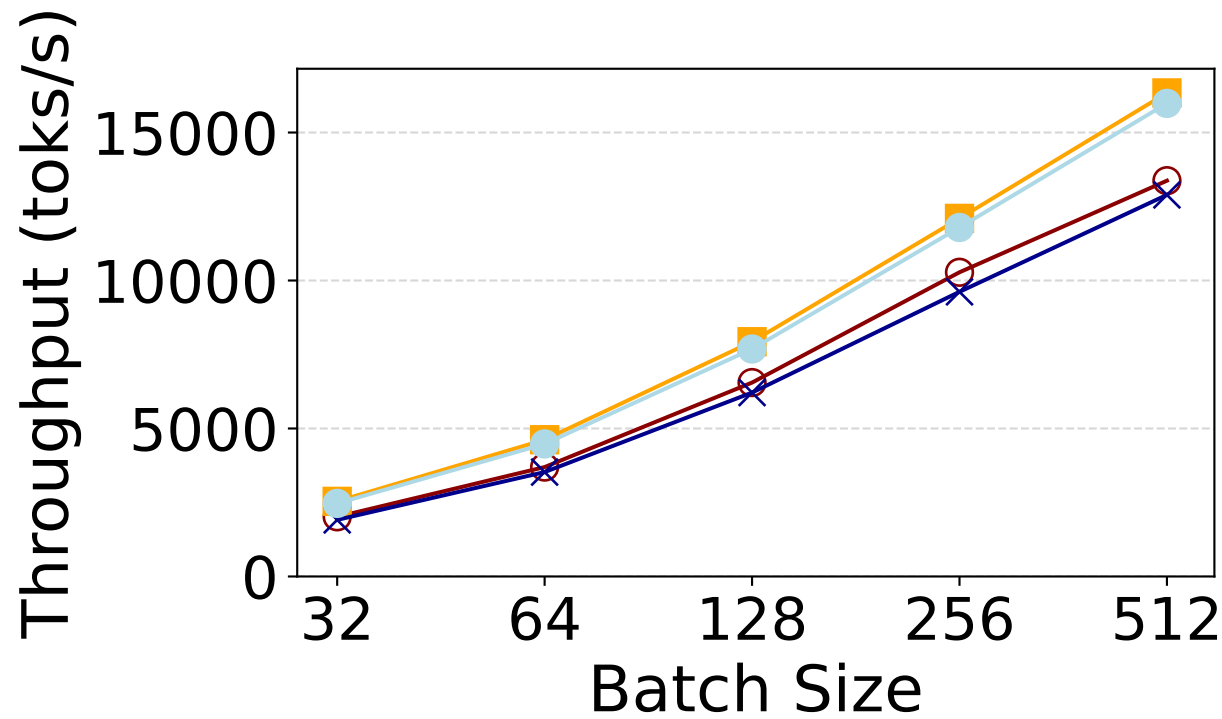

LLaMA3.1(8B)

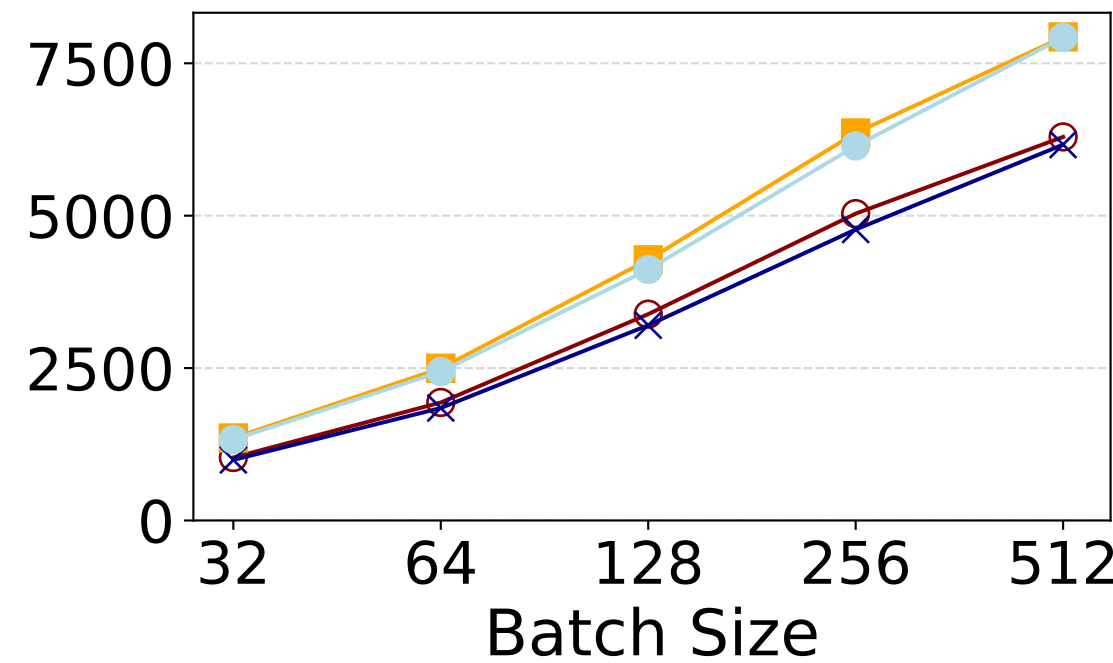

Mistral-Nemo(12B)

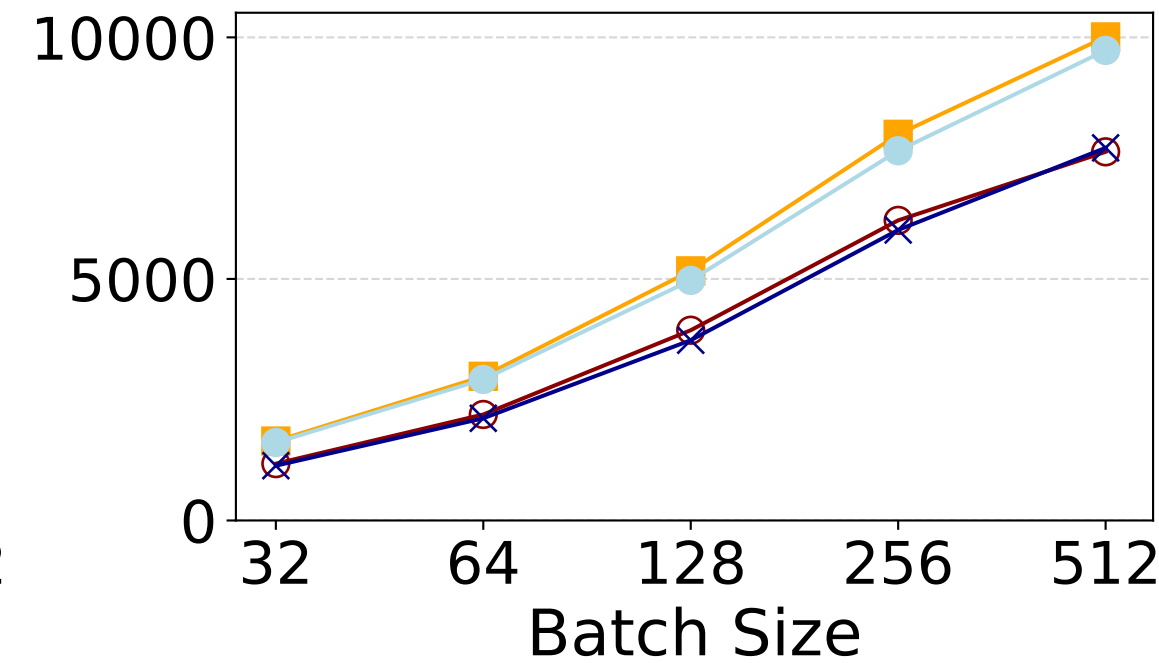

Phi-4(14B)

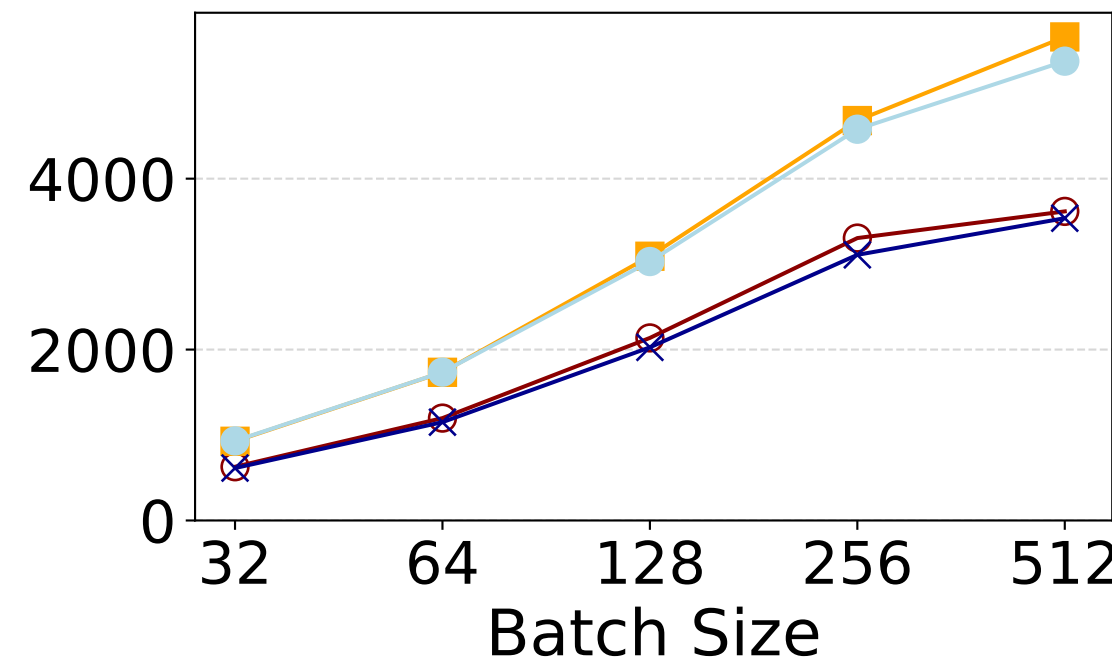

Mistral-Small(24B)

Supplement: supplementary_material [file e2e_performance_fp8_1024_512.pdf › NestedFP-main/NestedFP-main/utils/draw/e2e_performance_fp8_1024_512.pdf]

—○— Torch FP16    —■— Torch FP8    —×— NestedFP16    —●— NestedFP8

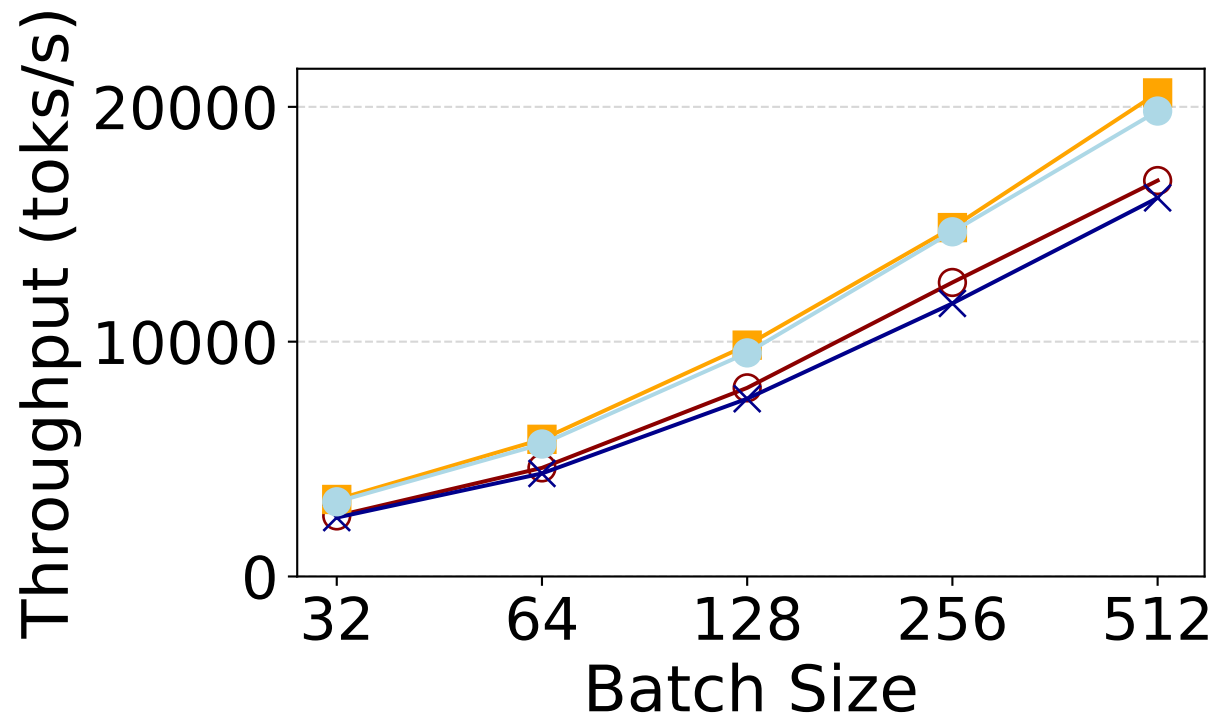

LLaMA3.1(8B)

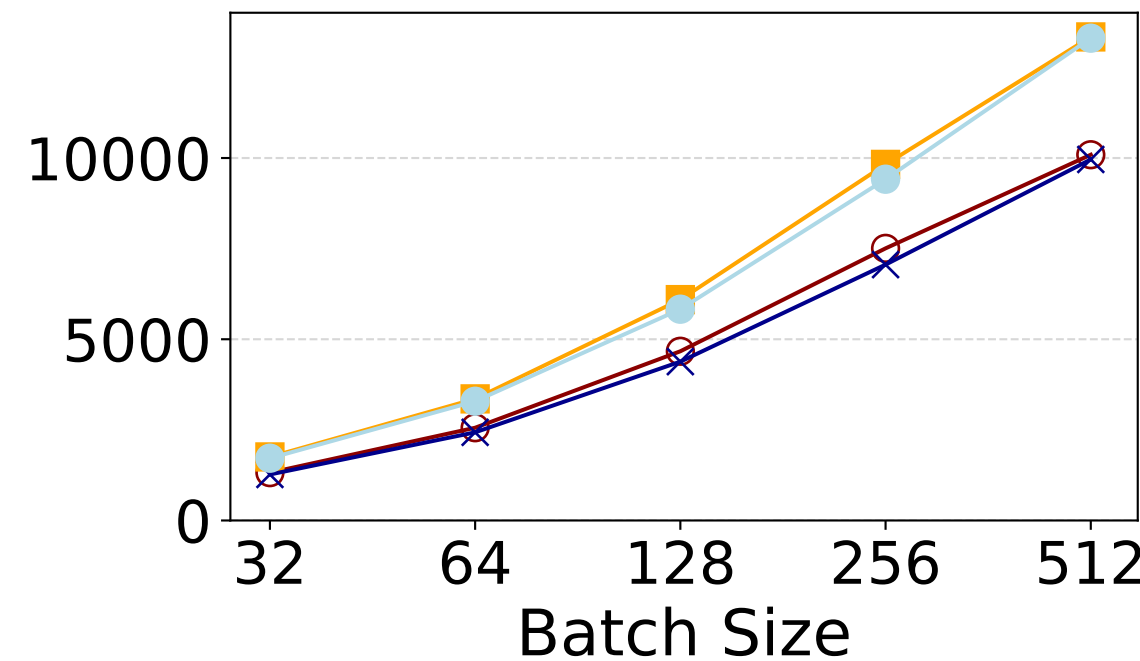

Mistral-Nemo(12B)

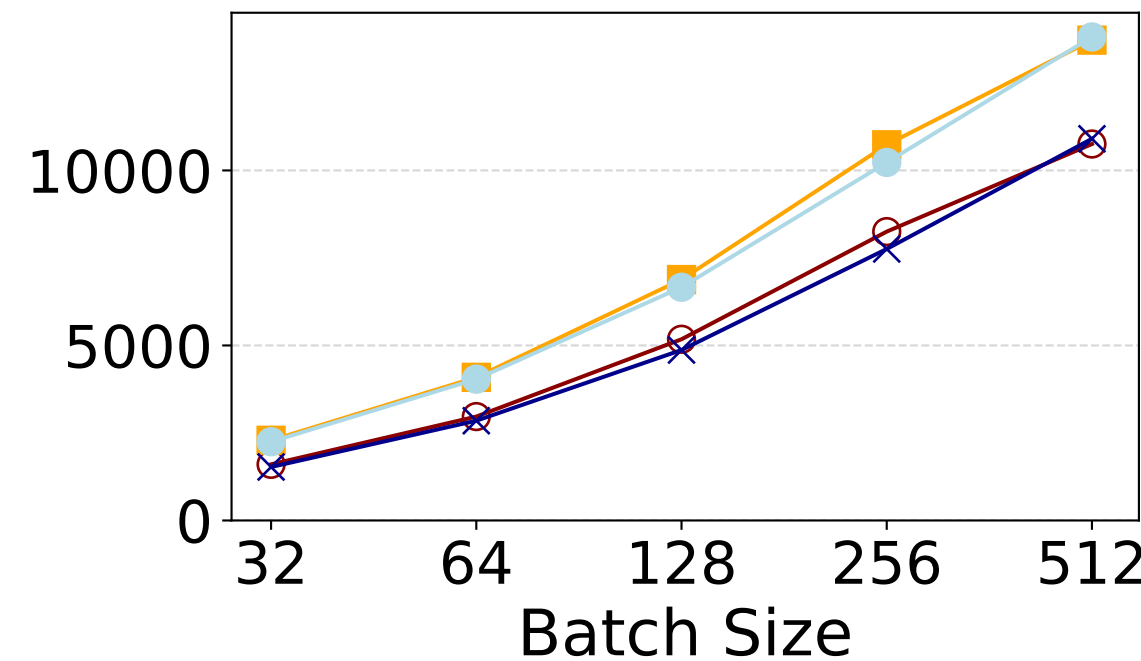

Phi-4(14B)

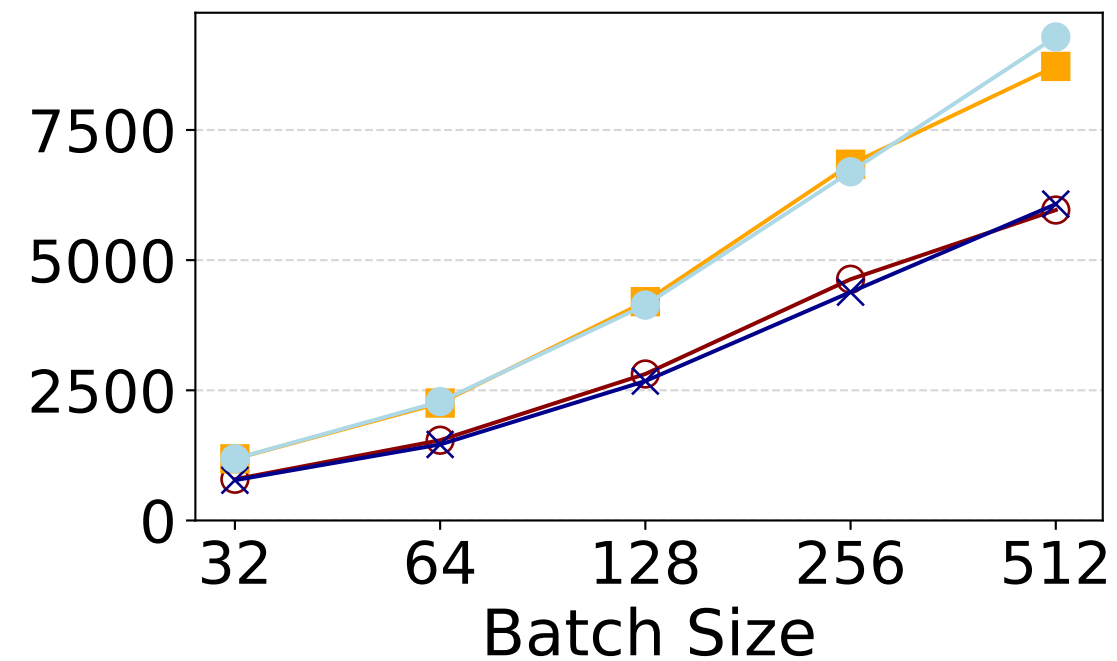

Mistral-Small(24B)

Supplement: supplementary_material [file e2e_performance_fp8_32_32.pdf › NestedFP-main/NestedFP-main/utils/draw/e2e_performance_fp8_32_32.pdf]

—●— CUTLASS Baseline W16A16      —●— NestedFP16

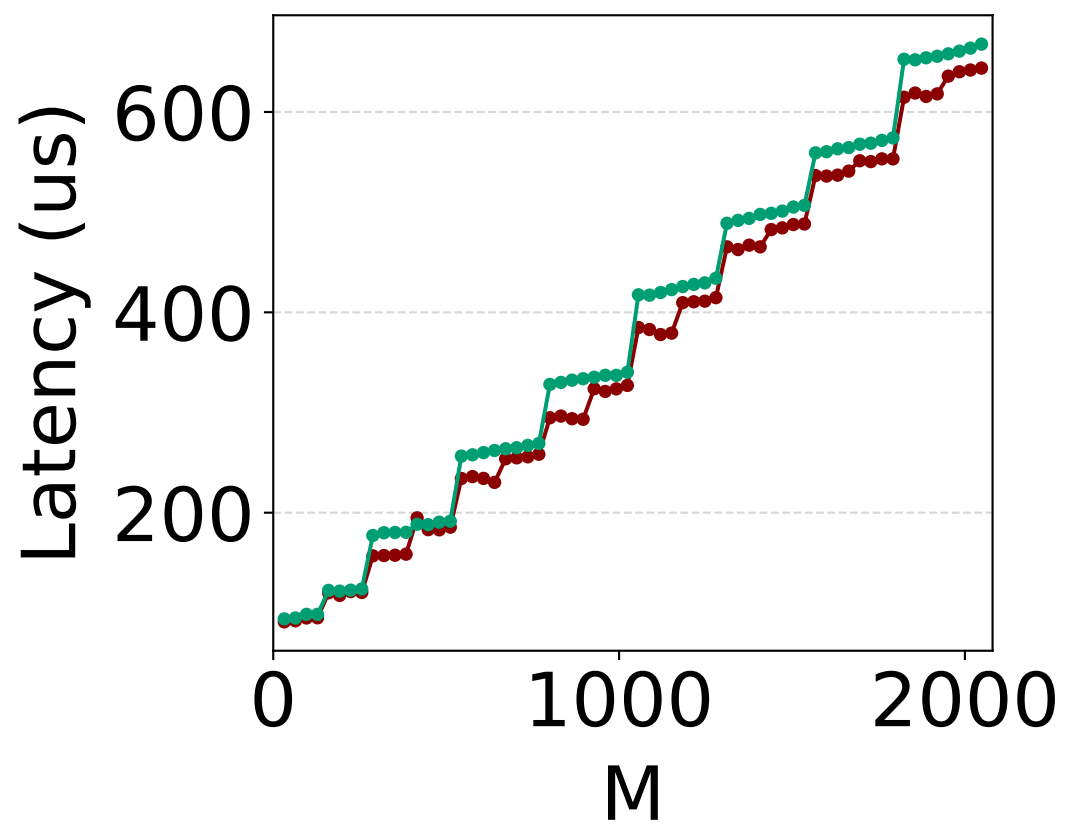

N = 28672, K = 4096

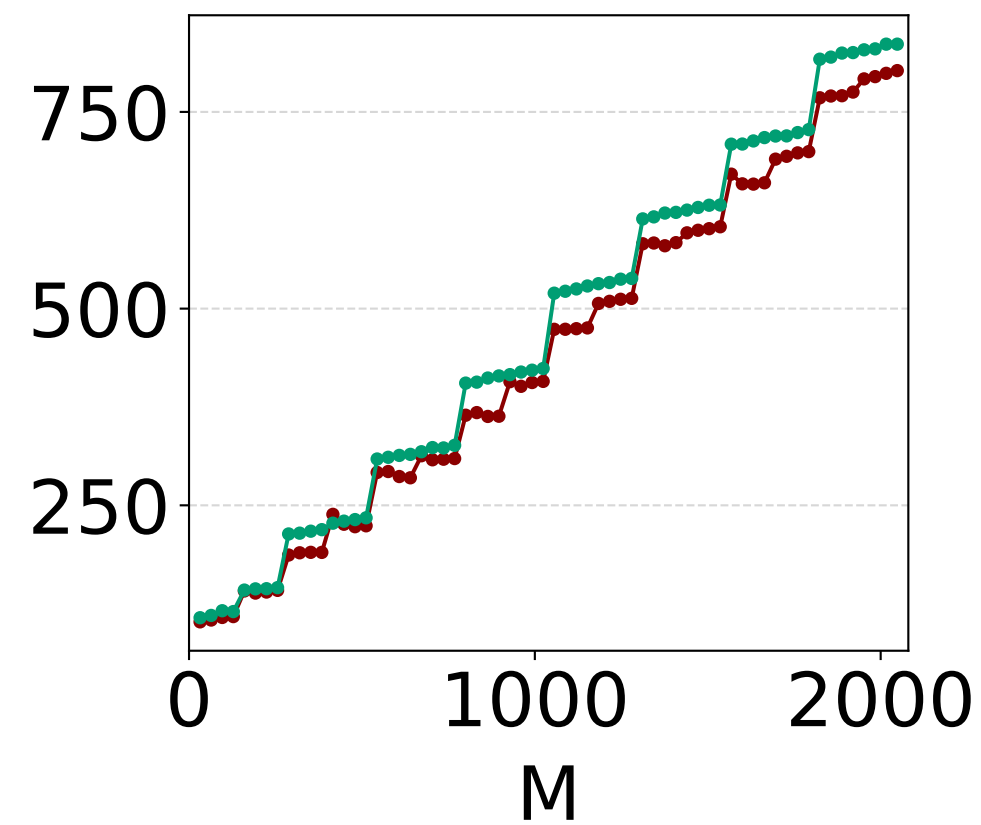

N = 28672, K = 5120

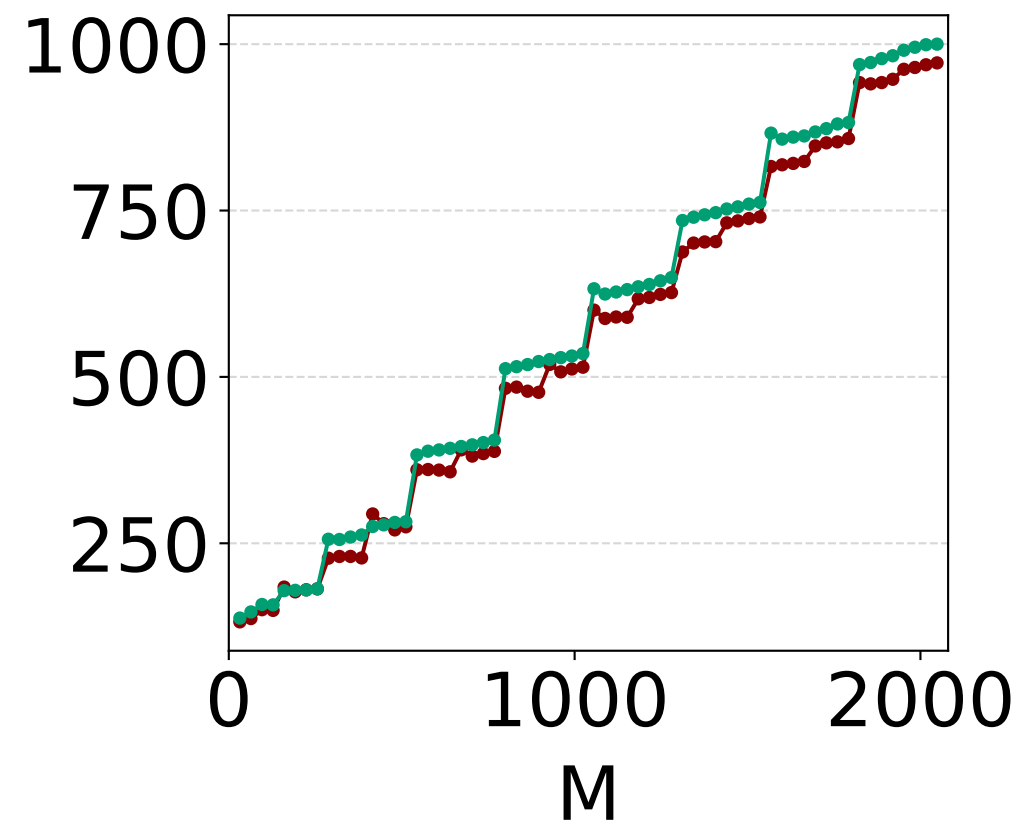

N = 35840, K = 5120

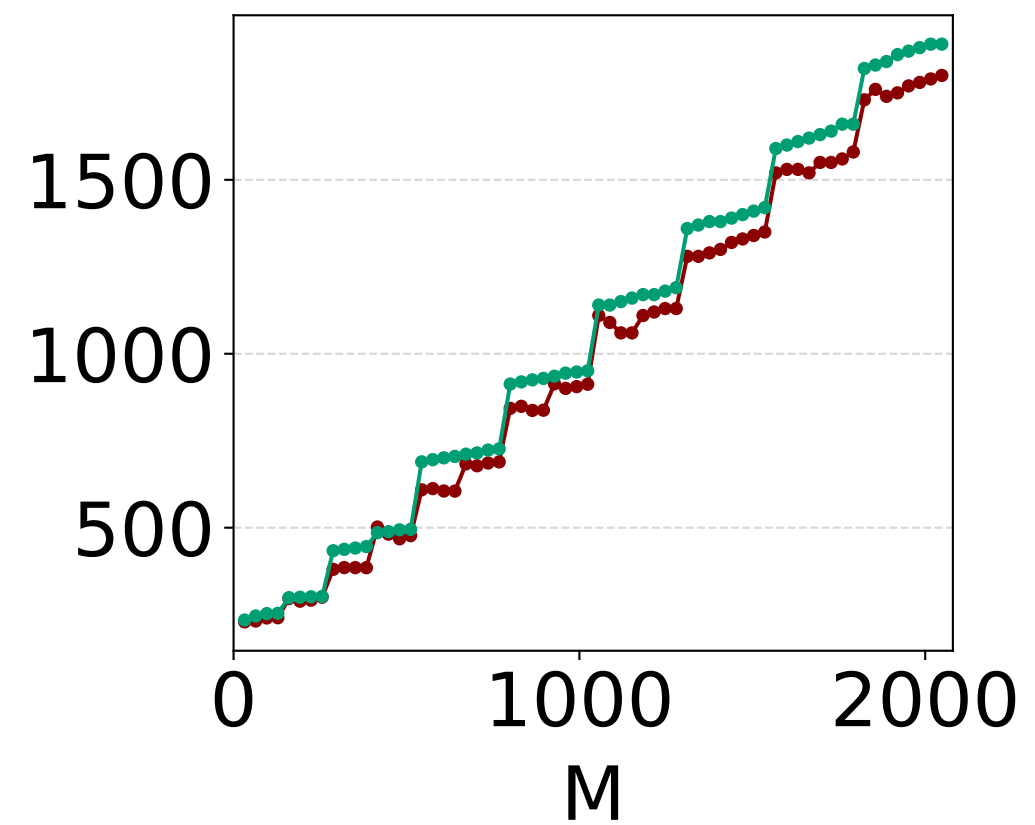

N = 65536, K = 5120

Supplement: supplementary_material [file kernel_performance_a.pdf › NestedFP-main/NestedFP-main/utils/draw/kernel_performance_a.pdf]

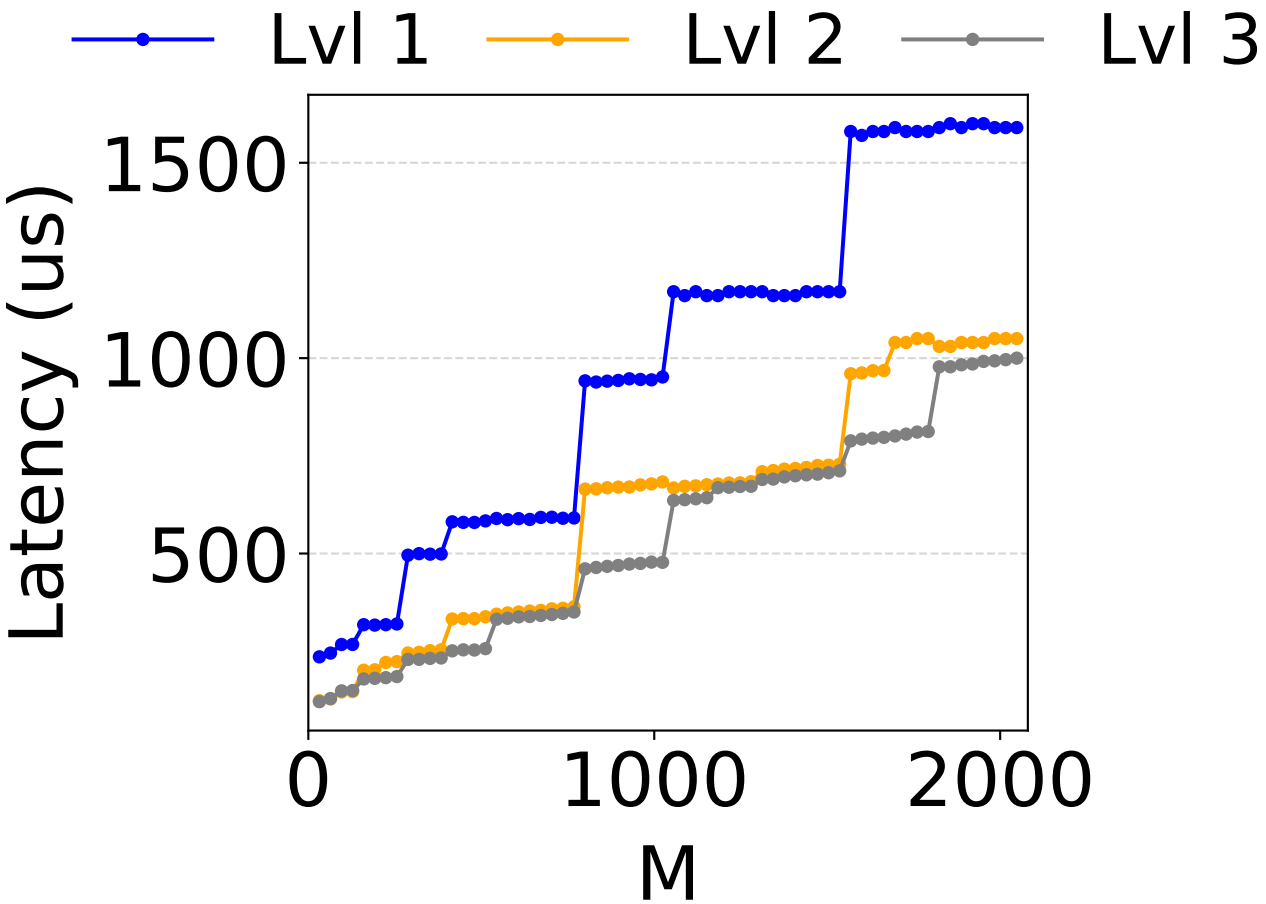

Supplement: supplementary_material [file kernel_performance_b.pdf › NestedFP-main/NestedFP-main/utils/draw/kernel_performance_b.pdf]

Throughput (toks/s)

—●— Torch FP16

—●— Dual-FP FP16

—●— Dual-FP FP8

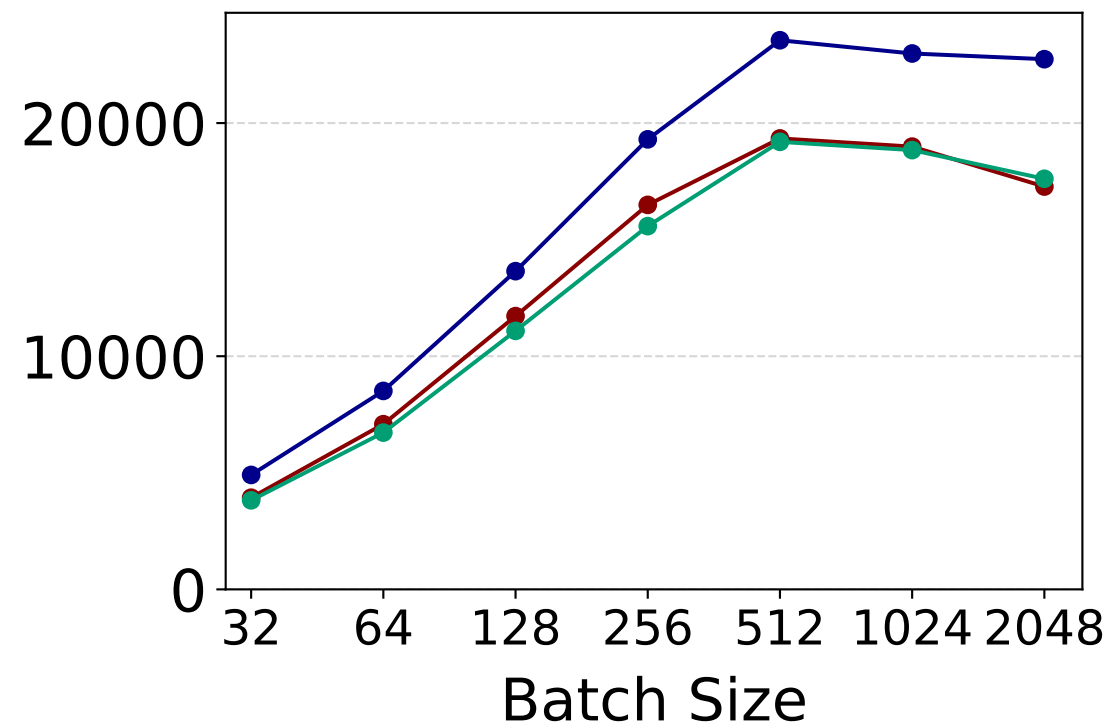

(a) Input Token = 16

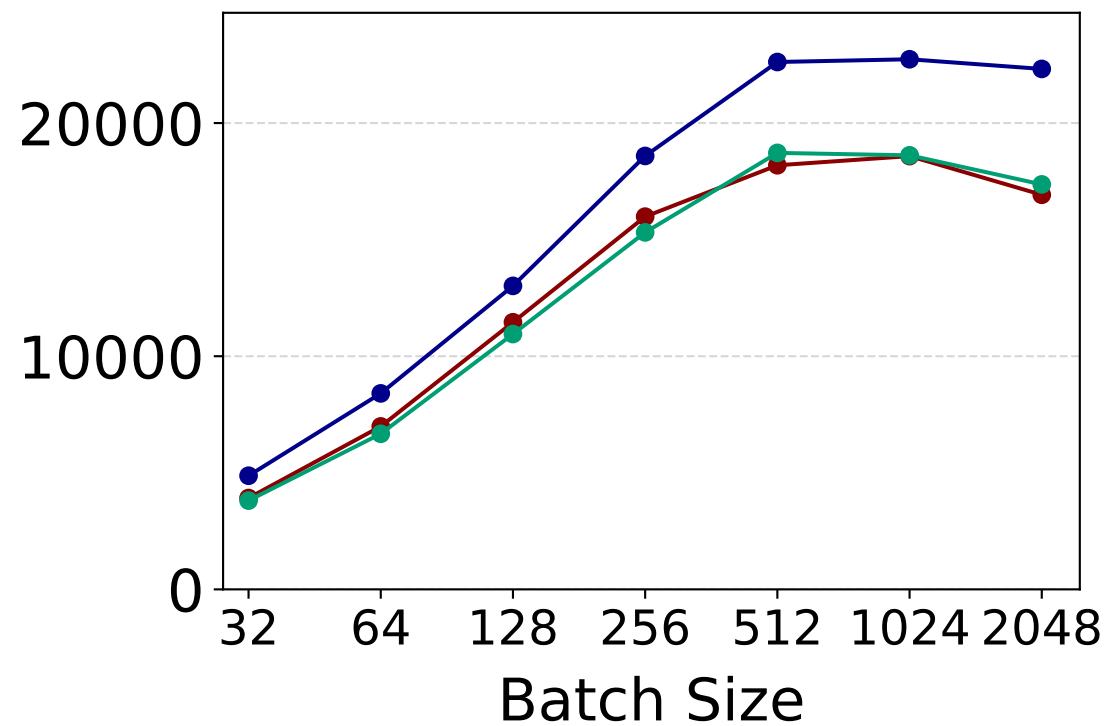

(b) Input Token = 256

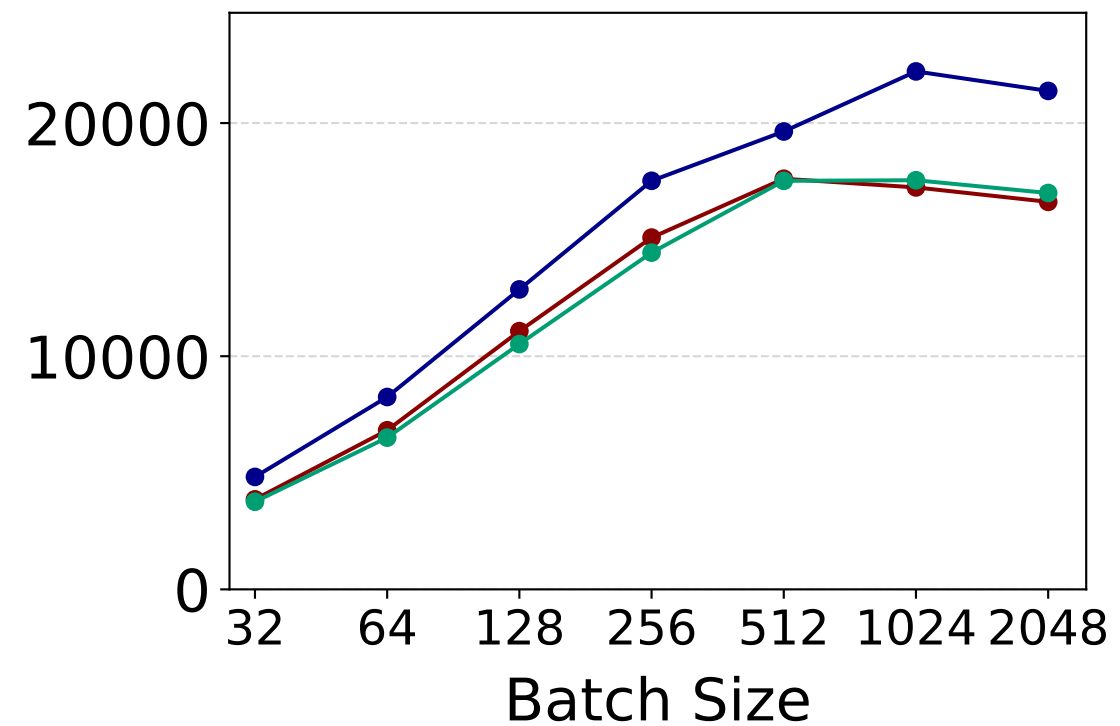

(c) Input Token = 1024

Supplement: supplementary_material [file llama3.1_8b_e2e_log.pdf › NestedFP-main/NestedFP-main/utils/draw/llama3.1_8b_e2e_log.pdf]

Throughput (toks/s)

Torch FP16      Dual-FP FP16      Dual-FP FP8

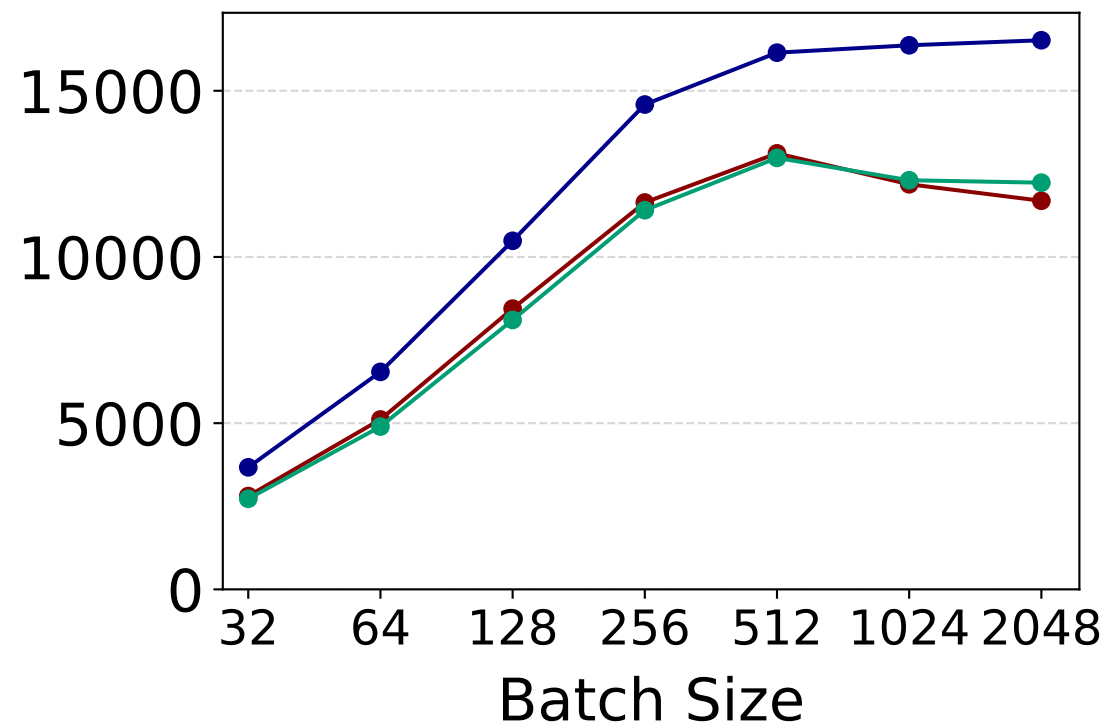

(a) Input Token = 16

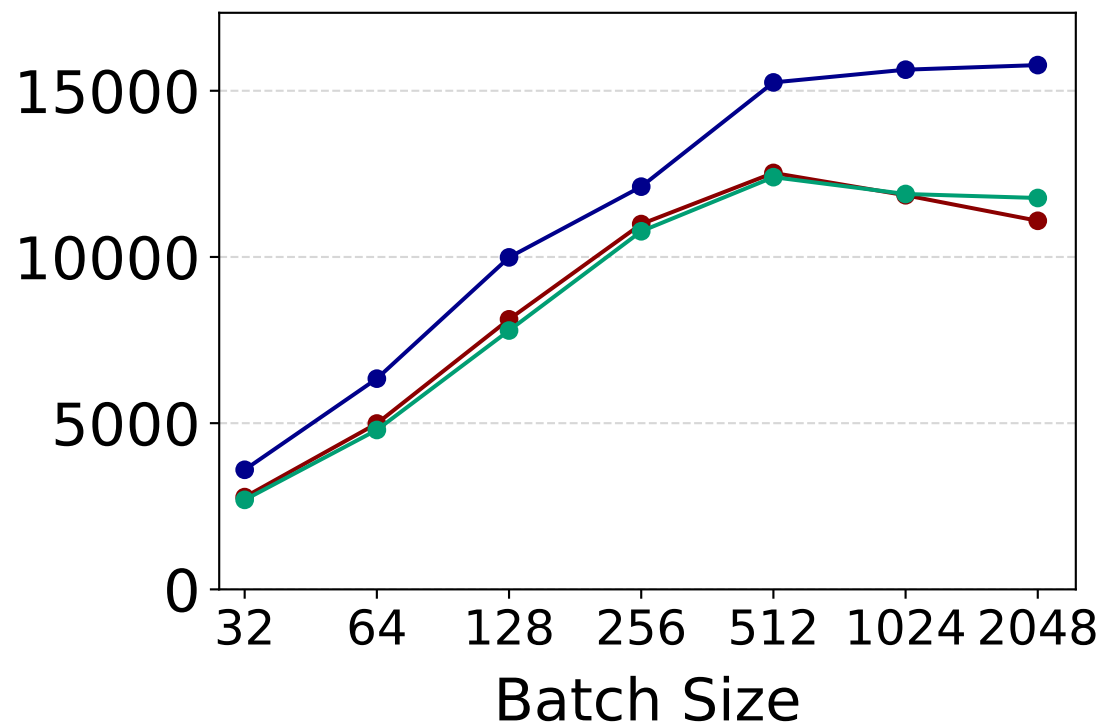

(b) Input Token = 256

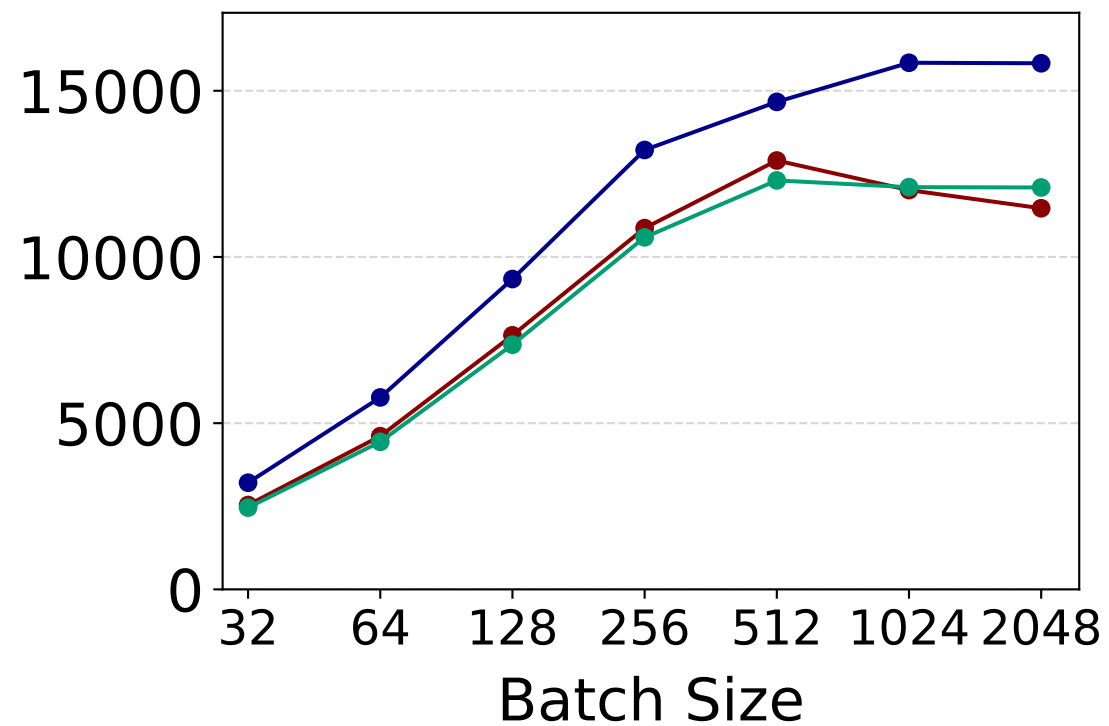

(c) Input Token = 1024

Supplement: supplementary_material [file mistral_nemo_12b_e2e_log.pdf › NestedFP-main/NestedFP-main/utils/draw/mistral_nemo_12b_e2e_log.pdf]

Throughput (toks/s)

Torch FP16      Dual-FP FP16      Dual-FP FP8

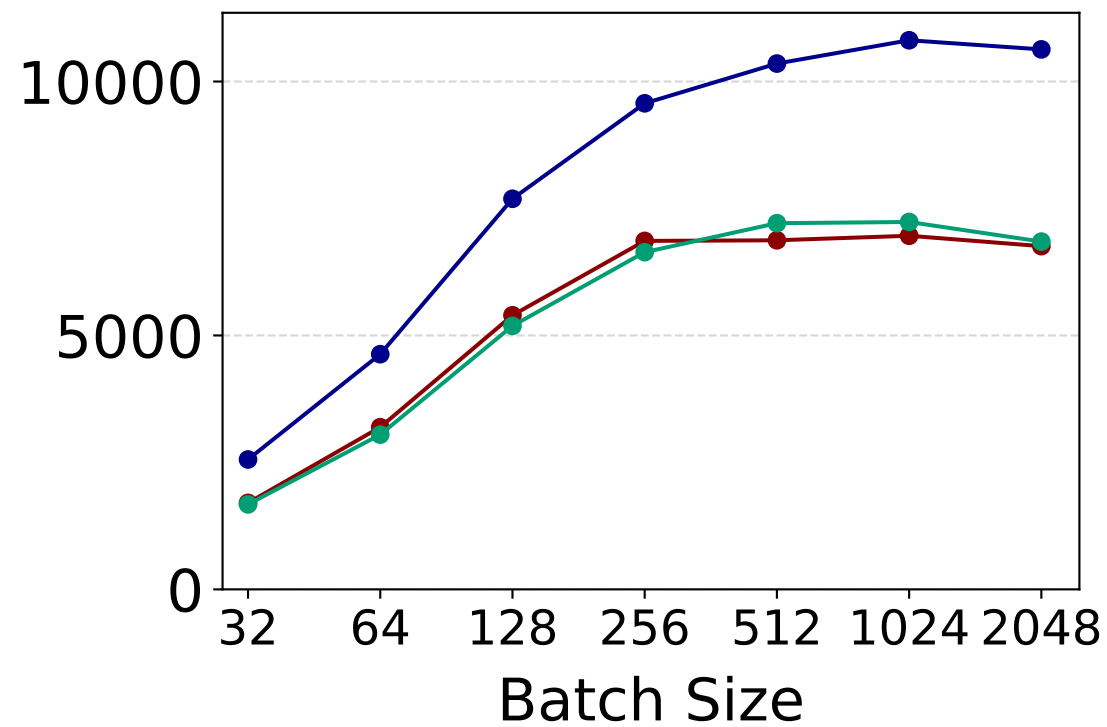

(a) Input Token = 16

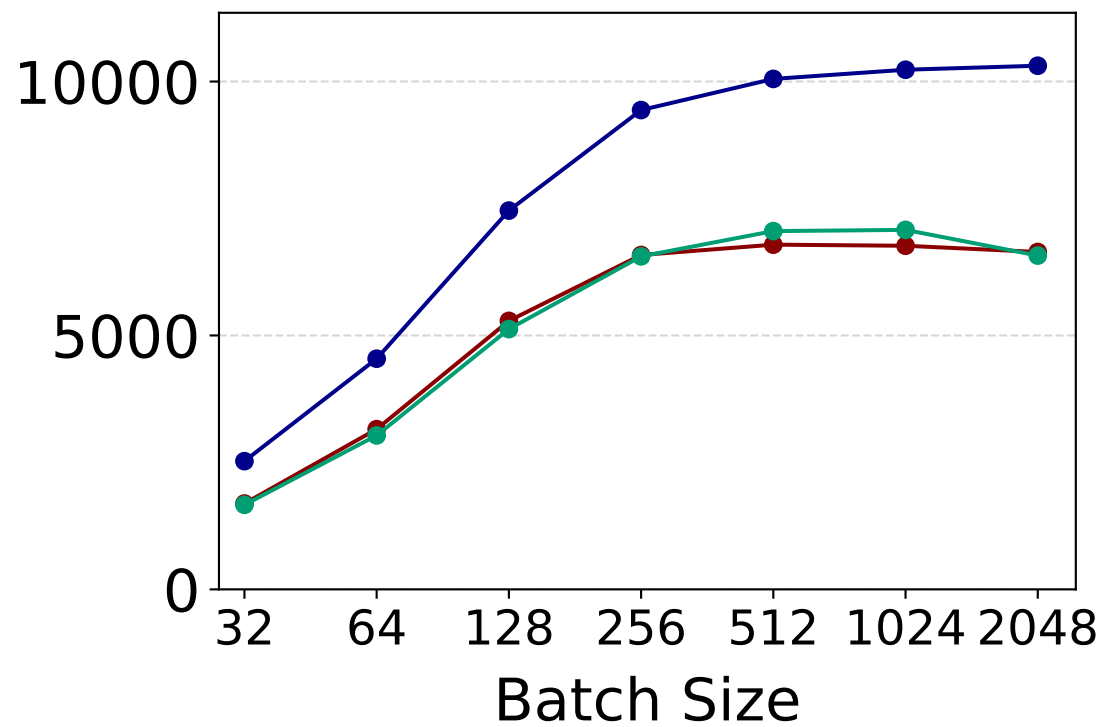

(b) Input Token = 256

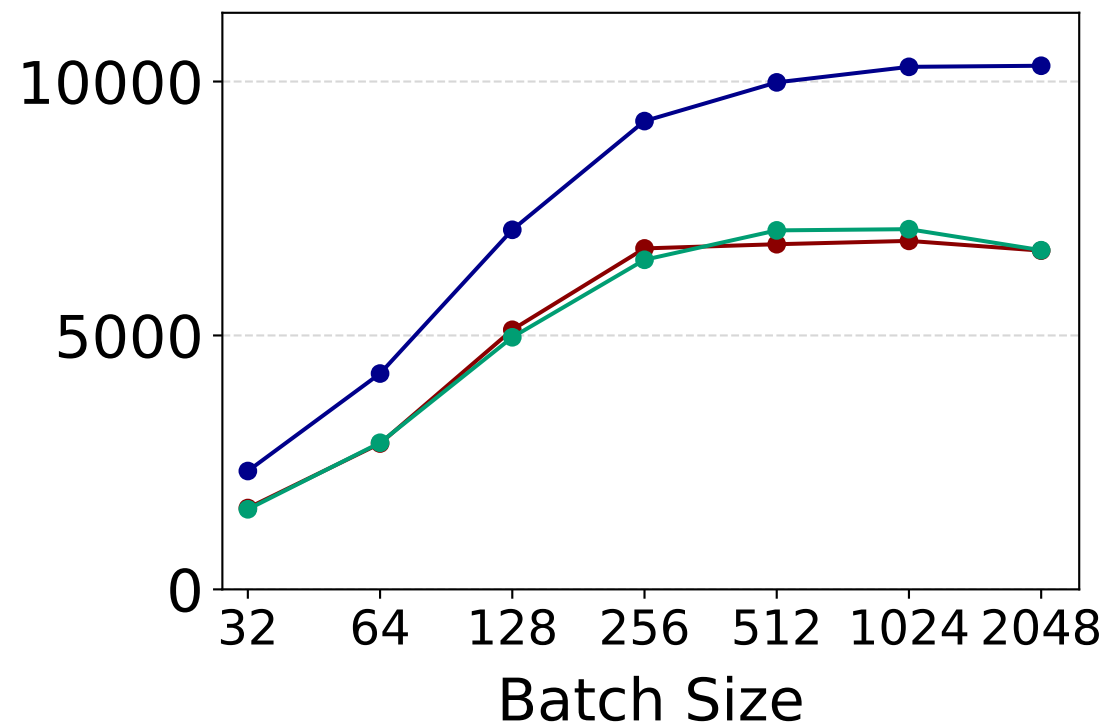

(c) Input Token = 1024

Supplement: supplementary_material [file mistral_small_24b_e2e_log.pdf › NestedFP-main/NestedFP-main/utils/draw/mistral_small_24b_e2e_log.pdf]

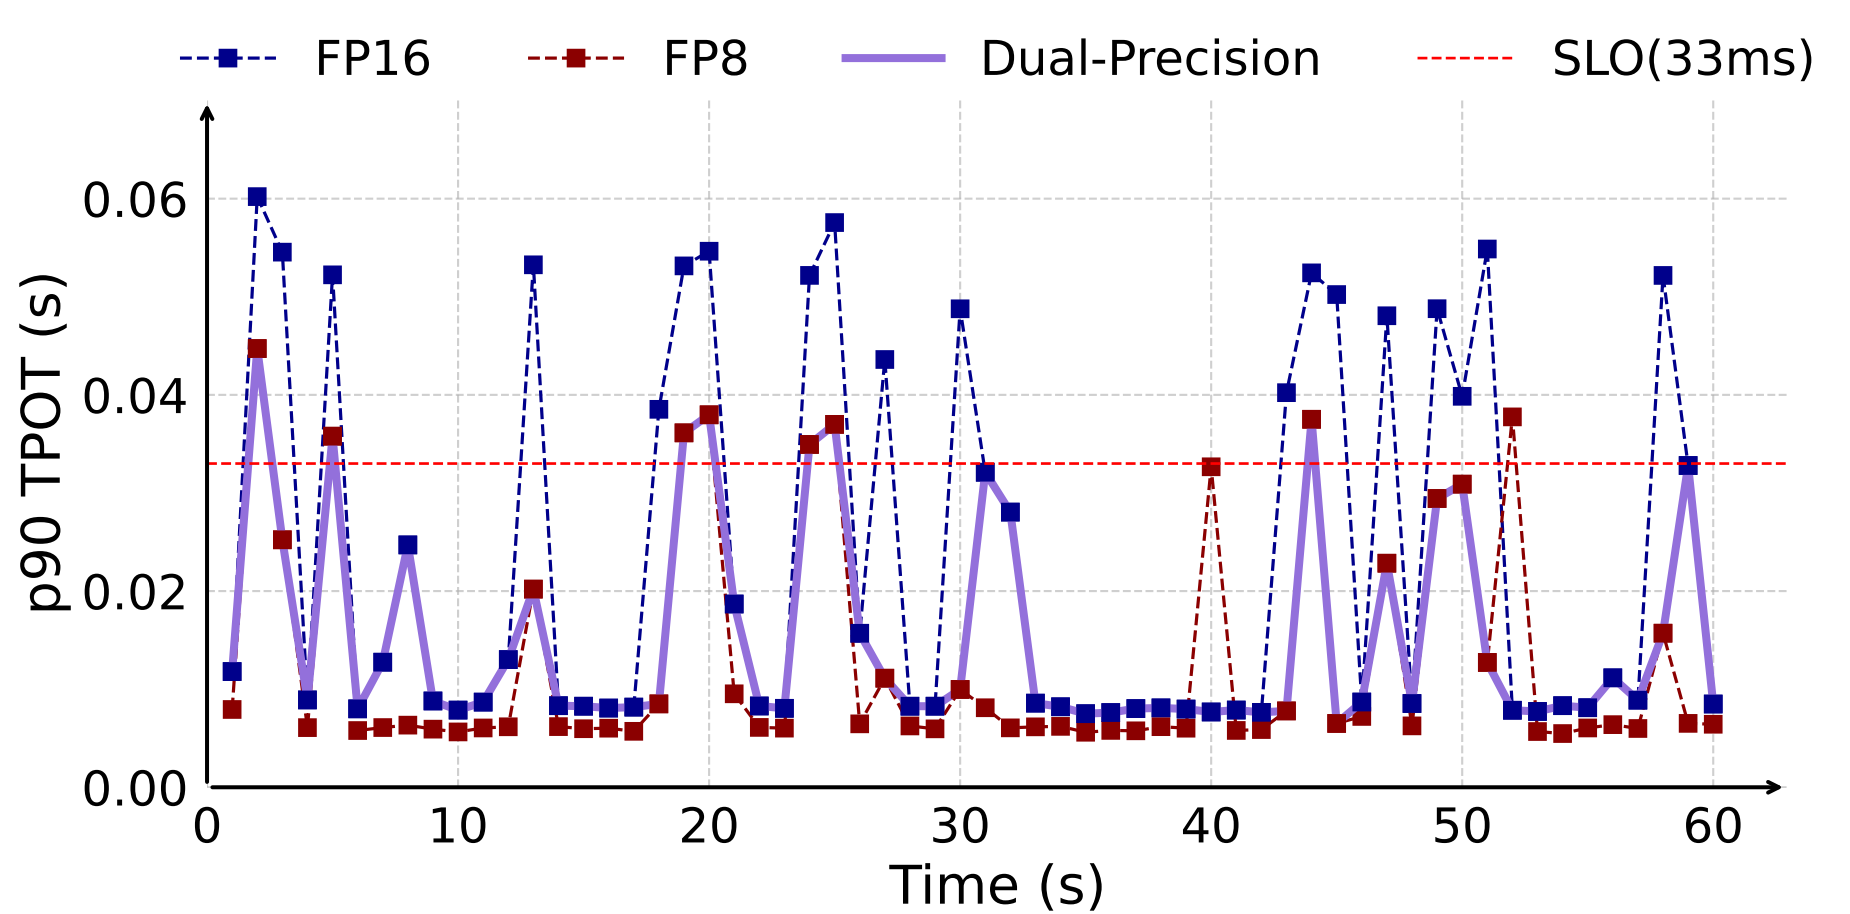

Supplement: supplementary_material [file p90_tpot_over_time.pdf › NestedFP-main/NestedFP-main/utils/draw/p90_tpot_over_time.pdf]

Request Rate

----- Average Request Rate

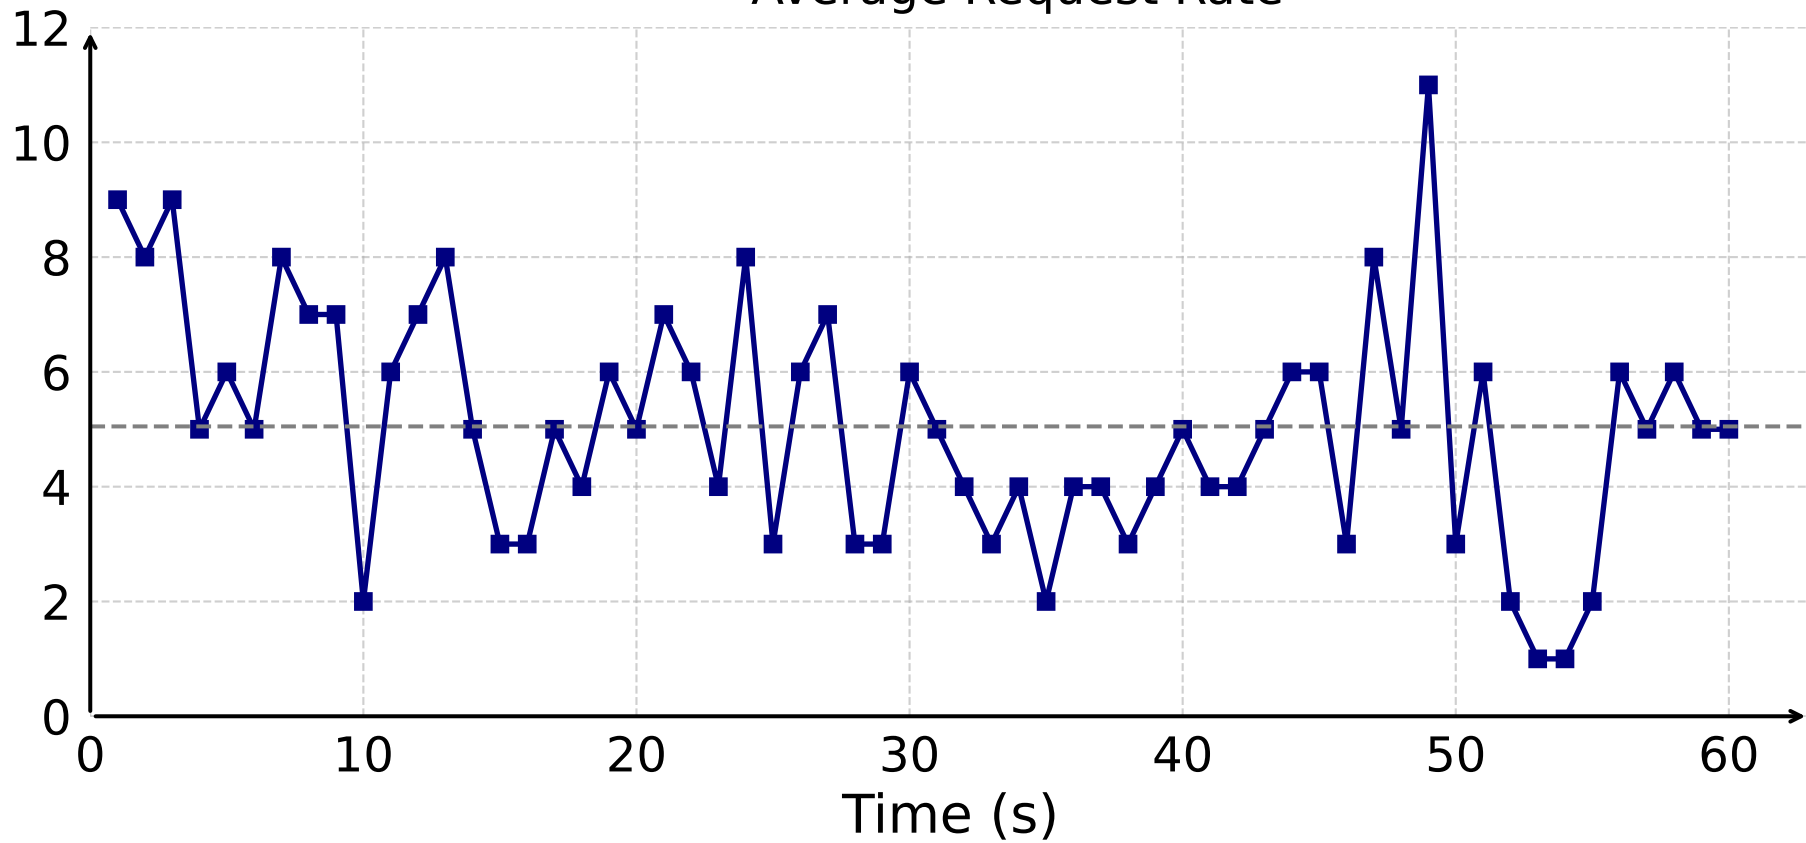

Supplement: supplementary_material [file request_rate_over_time.pdf › NestedFP-main/NestedFP-main/utils/draw/request_rate_over_time.pdf]
